# Supplementary material for: The Transcription Factor Nfatc2 Regulates β-Cell Proliferation and Genes Associated with Type 2 Diabetes in Mouse and Human Islets
Source: PLoS Genet. 2016 Dec 9;12(12):e1006466. doi: 10.1371/journal.pgen.1006466 (PMC5147809; doi:10.1371/journal.pgen.1006466)
Supplement: S2 Table — Excel sheet lists the 205 eQTLs for GWAS candidates genes that were identified genome-wide in islets from ~500 B6:BTBR-F2 obese mice. Genomic positions for the genes and their eQTLs are shown. Cis is defined as an eQTL that occurred within 2.5 cM (~5 Mbp) of the genomic position of the corresponding gene; all others are classified as trans-eQTLs. LOD scores for eQTLs are shown before and after conditioning on the cis-eQTL for Nftac2 and are colored by the magnitude of change; blue decrease, red increase, white no change. (XLSX) [file pgen.1006466.s011.xlsx]

## Sheet: T2D GWAS eQTLs in mouse islets
		Genome position			QTL position			QTL characteristics
Probe ID	Symbol	Chr	Pos (cM)	Pos (Mb)	Chr	Pos (cM)	Pos (Mb)	cis/trans	LOD	LOD|Nfatc2	delta LOD
1478324	Etv1	12	17.3841	39.5933	1	38.9999	74.8636	trans	6.31913	5.69118	-0.627946
10003839085	Arap1	7	51.731	108.497	1	41.8285	79.7746	trans	6.21804	6.50134	0.283301
10004034160	Slc30a8	15	22.9188	52.1672	1	60.8801	139.032	trans	5.05142	3.79934	-1.25208
509640	Pou5f1	17	18.3248	35.6475	1	62.1663	144.862	trans	6.63666	6.07158	-0.565074
519815	Kcnk16	14	11.3337	21.0807	1	87.0129	186.093	trans	5.62138	4.94182	-0.679553
10002912054	Lyplal1	1	88.5731	187.912	1	87.9026	187.019	cis	19.3929	22.8877	3.49477
499728	Tgfbr3	5	56.29	107.536	1	88.3474	187.482	trans	5.79501	5.58983	-0.205175
10002910761	Gipr	7	8.03359	19.7423	1	88.3474	187.482	trans	7.38685	9.65819	2.27134
504873	Rbm43	2	29.8417	51.7804	1	94.6164	192.123	trans	7.00309	6.96632	-0.0367624
10002939675	Camk1d	2	3.10404	5.21457	1	94.6164	192.123	trans	6.68769	6.19613	-0.491559
10004035863	Camk1d	2	3.1041	5.21482	1	94.6164	192.123	trans	6.06482	5.51784	-0.546982
10002909795	Cdc123	2	3.11699	5.71575	2	10.6865	14.8143	trans	5.58472	4.9592	-0.625521
513045	Gpsm1	2	17.4858	26.2036	2	23.8444	40.7835	trans	8.96164	9.05519	0.0935537
10004034736	Ide	19	32.1527	37.3763	2	35.8413	61.6381	trans	9.83598	7.42269	-2.41329
515887	Rbms1	2	35.5128	60.5909	2	37.1307	63.4109	cis	16.401	11.6616	-4.73943
513379	Grb14	2	38.4444	64.7507	2	39.1774	66.806	cis	20.1256	24.7422	4.6166
10002911240	2010107G23Rik	10	37.821	61.5712	2	41.7035	71.8684	trans	5.07124	4.08134	-0.989904
506195	Hhex	19	32.2743	37.515	2	41.7035	71.8684	trans	6.02612	3.85405	-2.17207
515401	Gabra4	5	44.9422	71.9626	2	42.1925	72.6442	trans	6.88214	5.14594	-1.7362
10002897749	Plekha1	7	68.5499	138.057	2	46.2275	79.1111	trans	5.27355	5.70183	0.428278
10003838170	Palm2	4	30.1134	57.7294	2	48.2682	81.4723	trans	26.5319	20.5715	-5.96042
504383	Lgr5	10	69.4692	114.889	2	49.2265	84.834	trans	10.9633	6.35123	-4.61211
1481033	Hmga2	10	77.0054	119.799	2	52.1013	94.9189	trans	5.12703	4.30254	-0.824488
10004037064	Adcy5	16	20.1668	35.3057	2	54.4891	106.19	trans	9.81822	2.82988	-6.98833
516656	Rnd3	2	28.8081	50.9862	2	54.4891	106.19	trans	6.10626	2.85221	-3.25405
515248	Hunk	16	48.9059	90.4997	2	56.2676	109.84	trans	10.7693	2.10725	-8.66208
10004035814	Il20ra	10	12.3296	19.4797	2	61.1214	117.951	trans	6.95491	3.06574	-3.88917
10004034772	Kcnq1	7	85.4553	150.311	2	61.1214	117.951	trans	6.31737	2.61413	-3.70323
10002907712	Tmem45b	9	17.7971	31.234	2	61.1214	117.951	trans	5.88024	4.01336	-1.86688
514795	Trp53inp1	4	6.40626	11.1014	2	63.3895	121.192	trans	5.42056	2.79464	-2.62592
10002910761	Gipr	7	8.03359	19.7423	2	64.0388	124.239	trans	8.23391	2.83546	-5.39845
518695	Tle4	19	9.61563	14.5227	2	64.1308	124.956	trans	5.70911	6.4756	0.766484
10002910302	Kcnq1	7	85.8468	150.613	2	65.3476	128.916	trans	5.39302	3.58671	-1.8063
10002907629	Srr	11	45.9805	74.7227	2	65.3476	128.916	trans	6.88945	1.92855	-4.9609
515931	Pcbd2	13	30.9302	55.8781	2	66.0076	131.241	trans	5.6877	3.54201	-2.14569
10004037342	St6gal1	16	11.7659	23.3586	2	66.1013	132.423	trans	6.77067	5.61206	-1.15861
498273	Zbed3	13	46.7627	96.1077	2	66.1013	132.423	trans	7.60576	4.87329	-2.73247
10003837317	Ctcfl	2	97.4871	172.921	2	68.2862	135.475	trans	8.35129	2.28462	-6.06667
10002916917	Spry2	14	58.3623	106.292	2	71.43	141.439	trans	7.51159	5.15671	-2.35488
10002907346	Glis3	19	24.8133	28.3734	2	71.869	142.275	trans	5.07858	1.27201	-3.80657
10002911876	Tspan8	10	70.0197	115.287	2	72.308	143.112	trans	19.3243	4.68287	-14.6415
10004034160	Slc30a8	15	22.9188	52.1672	2	73.259	146.274	trans	10.1987	1.7977	-8.40097
10002939675	Camk1d	2	3.10404	5.21457	2	74.8112	147.666	cis/trans	44.0227	21.1121	-22.9106
10002910511	Slc16a11	11	42.5332	70.0299	2	74.8112	147.666	trans	17.4986	1.93112	-15.5675
10004037520	Tcf7l2	19	52.3275	56.0076	2	74.8112	147.666	trans	9.15714	2.59147	-6.56567
10003118483	Adamts9	6	61.6567	92.7227	2	75.2253	147.795	trans	5.94842	1.94799	-4.00043
10004035863	Camk1d	2	3.1041	5.21482	2	75.2253	147.795	cis/trans	43.8711	20.2838	-23.5873
516324	Maea	5	19.6009	33.7157	2	75.2253	147.795	trans	8.22267	3.21408	-5.00859
499728	Tgfbr3	5	56.29	107.536	2	75.2253	147.795	trans	20.0218	1.01938	-19.0024
519646	Cox7b2	5	44.8939	71.8343	2	75.6899	147.933	trans	5.27202	1.9324	-3.33962
10002940291	Glis3	19	24.7609	28.3334	2	77.017	151.981	trans	10.4981	1.63214	-8.86598
10003839955	Prox1	1	94.301	191.942	2	77.017	151.981	trans	16.5325	2.45825	-14.0742
519815	Kcnk16	14	11.3337	21.0807	2	77.477	153.191	trans	10.4902	1.80682	-8.68338
514797	Psmd6	14	5.8424	14.9448	2	77.477	153.191	trans	11.2285	3.25597	-7.97254
10002933663	Rbms1	2	35.5117	60.5883	2	80.0672	159.118	trans	12.5029	1.10764	-11.3953
1013673	Pparg	6	71.7687	115.423	2	83.1868	162.677	trans	6.91921	3.18191	-3.7373
10002900948	R3hdml	2	83.4597	163.326	2	83.1868	162.677	cis	5.17745	2.05665	-3.1208
1009058	Cdkn2b	4	42.6473	88.9523	2	84.7893	164.2	trans	5.39186	4.02104	-1.37082
514567	Hnf1a	5	61.0226	115.399	2	84.7893	164.2	trans	5.7788	2.82816	-2.95064
10002912054	Lyplal1	1	88.5731	187.912	2	85.6493	165.877	trans	8.53711	2.78825	-5.74887
10002908130	Lpp	16	13.1422	24.9809	2	87.4956	167.589	trans	5.84358	16.2313	10.3878
10002915996	Notch2	3	40.6687	97.9513	2	88.4188	168.444	trans	5.1872	1.00025	-4.18695
504540	Adamts9	6	61.7343	92.8763	2	89.3254	169.191	trans	5.18178	1.79179	-3.38999
499759	Ache	5	81.4683	137.735	2	91.9128	171.393	trans	6.08401	1.50838	-4.57563
10002914177	Mphosph9	5	68.8157	124.703	2	91.9128	171.393	trans	5.36915	0.63552	-4.73363
1013673	Pparg	6	71.7687	115.423	3	17.4612	38.2978	trans	6.66901	6.39211	-0.276909
513379	Grb14	2	38.4444	64.7507	3	37.272	88.9742	trans	5.39563	5.02676	-0.368873
518695	Tle4	19	9.61563	14.5227	3	37.6915	89.8793	trans	7.40032	7.47713	0.0768101
1478324	Etv1	12	17.3841	39.5933	3	41.4736	100.319	trans	5.26826	4.0831	-1.18516
499728	Tgfbr3	5	56.29	107.536	3	42.5897	104.809	trans	9.56092	8.02396	-1.53696
515248	Hunk	16	48.9059	90.4997	3	42.5897	104.809	trans	8.52552	6.65428	-1.87124
516656	Rnd3	2	28.8081	50.9862	3	57.0274	130.601	trans	6.65227	5.11629	-1.53597
514795	Trp53inp1	4	6.40626	11.1014	4	5.86325	10.2844	cis	5.25341	5.60868	0.355271
592432	Cdkn2a	4	42.6378	88.9205	4	27.7589	54.1176	trans	6.84498	6.62545	-0.21953
519587	Ptprd	4	36.7884	75.5874	4	37.0942	76.1752	cis	72.6867	72.0789	-0.607772
1364773	Ptprd	4	36.7888	75.5907	4	37.6523	77.9346	cis	38.2178	38.6757	0.45787
1009058	Cdkn2b	4	42.6473	88.9523	4	42.8111	89.5	cis	46.7205	55.9555	9.23503
499907	F3	3	49.7462	121.437	4	42.8111	89.7451	trans	5.0481	5.01811	-0.0299829
505322	Pex5l	3	15.0138	32.852	4	54.5159	109.542	trans	5.33817	5.3007	-0.0374746
508410	Pepd	7	21.1004	35.8296	4	54.6064	110.788	trans	8.09886	8.03954	-0.0593258
513379	Grb14	2	38.4444	64.7507	4	66.2863	129.755	trans	7.47336	7.42042	-0.0529418
10002910761	Gipr	7	8.03359	19.7423	4	81.3031	144.119	trans	5.60532	5.80795	0.202636
10002931396	Irs1	1	42.5834	82.2299	4	82.0481	148.045	trans	5.14433	5.17506	0.0307327
10004034160	Slc30a8	15	22.9188	52.1672	4	85.0723	150.99	trans	5.76773	6.40691	0.63918
513394	Wfs1	5	21.3937	37.3574	5	21.5657	37.4937	cis	139.398	142.363	2.96454
499759	Ache	5	81.4683	137.735	5	54.7406	103.696	trans	6.45939	6.01357	-0.445824
10002913735	Rnf6	5	88.5755	147.021	5	88.3493	146.474	cis	82.8598	89.1522	6.29247
1013673	Pparg	6	71.7687	115.423	6	56.4354	78.9472	trans	6.59156	6.67345	0.081888
10003118483	Adamts9	6	61.6567	92.7227	6	60.4299	90.2938	cis	16.5347	16.375	-0.159683
10002916454	Dner	1	43.7127	84.3665	6	72.1521	116.207	trans	6.31283	6.24669	-0.0661459
513379	Grb14	2	38.4444	64.7507	6	81.3939	127.184	trans	5.61893	5.44725	-0.171678
10004036755	Pax4	6	26.4454	28.3923	6	91.832	142.002	trans	54.2478	53.8919	-0.355851
1365651	Irs1	1	42.5865	82.2331	6	92.2889	142.487	trans	154.084	155.1	1.01647
519587	Ptprd	4	36.7884	75.5874	7	2.1403	3.66487	trans	5.16361	4.7601	-0.403507
10002912054	Lyplal1	1	88.5731	187.912	7	3.89518	6.14055	trans	8.17845	9.12344	0.94499
10003118483	Adamts9	6	61.6567	92.7227	7	6.74449	17.5133	trans	7.40725	8.8399	1.43265
10002910761	Gipr	7	8.03359	19.7423	7	7.70414	18.8885	cis	48.7904	51.2486	2.45814
508410	Pepd	7	21.1004	35.8296	7	20.238	35.3646	cis	38.7953	38.4506	-0.344687
10002931396	Irs1	1	42.5834	82.2299	7	22.7255	37.3371	trans	8.76627	8.56224	-0.204025
515401	Gabra4	5	44.9422	71.9626	7	25.1601	37.83	trans	5.38148	5.01051	-0.370962
10002910302	Kcnq1	7	85.8468	150.613	7	36.6512	66.2604	trans	6.57698	6.90765	0.330665
10003114850	Slc44a3	3	49.6062	121.239	7	38.4306	74.8367	trans	5.88436	5.93088	0.0465202
10004034943	Ap3s2	7	45.3768	87.0246	7	45.4287	87.1747	cis	159.025	162.879	3.85433
10004036834	Ap3s2	7	45.3753	87.0202	7	45.8013	88.1489	cis	39.1113	39.3149	0.203583
503266	Prc1	7	45.4544	87.4609	7	46.8451	91.2312	cis	59.9411	60.5159	0.574845
506017	Zfand6	7	47.133	91.7639	7	47.4043	93.8125	cis	61.8803	63.3556	1.47529
500766	Grk5	19	59.9904	61.1682	7	49.2659	102.15	trans	5.02471	4.95314	-0.0715758
10002897749	Plekha1	7	68.5499	138.057	7	49.2659	102.15	trans	5.04091	5.03827	-0.00264647
10002911876	Tspan8	10	70.0197	115.287	7	82.2535	147.837	trans	5.74449	3.88524	-1.85925
506195	Hhex	19	32.2743	37.515	7	87.4024	151.814	trans	5.7502	5.16742	-0.582782
10004034452	Igf2bp2	16	10.6636	22.0592	7	87.4024	151.814	trans	7.17707	6.27733	-0.899737
503165	Wwox	8	64.2293	117.877	8	62.9442	116.237	cis	18.5703	18.5738	0.00346255
506195	Hhex	19	32.2743	37.515	8	68.3183	120.528	trans	6.09192	5.48949	-0.602433
10002917195	Rhou	8	74.9123	126.188	8	74.9645	126.493	cis	15.1473	14.6872	-0.460031
10004035956	Tmem154	3	35.9935	84.508	9	19.0944	32.9179	trans	5.50829	5.36875	-0.13954
513611	C2cd4b	9	37.6418	67.6087	9	32.4419	56.5751	trans	8.25367	7.48459	-0.769079
513915	Sgcg	14	33.0773	61.8405	9	47.292	86.2012	trans	5.27942	5.76707	0.487645
509640	Pou5f1	17	18.3248	35.6475	9	58.8438	108.101	trans	24.3829	25.1188	0.735902
10002907712	Tmem45b	9	17.7971	31.234	9	60.9486	111.095	trans	6.54563	7.04509	0.499458
503864	Bcl11a	11	14.8029	24.0731	10	43.3929	70.2389	trans	7.30918	7.29215	-0.0170269
510335	Pten	19	27.0851	32.8945	10	73.552	117.839	trans	6.0824	5.97273	-0.109665
1013673	Pparg	6	71.7687	115.423	11	2.3361	3.23422	trans	5.48671	4.63737	-0.849338
10002917195	Rhou	8	74.9123	126.188	11	3.12341	5.27235	trans	8.19689	6.98495	-1.21193
10002916454	Dner	1	43.7127	84.3665	11	4.9012	8.04059	trans	5.4278	5.24499	-0.182805
500886	Map3k1	13	60.8056	112.537	11	12.8201	21.2384	trans	5.68469	5.10657	-0.578116
503864	Bcl11a	11	14.8029	24.0731	11	17.0916	27.3452	cis	6.69794	5.80445	-0.893486
499728	Tgfbr3	5	56.29	107.536	11	19.0736	30.7156	trans	7.9007	6.87228	-1.02843
10002911876	Tspan8	10	70.0197	115.287	11	23.4377	36.6165	trans	6.22406	4.21999	-2.00406
1364773	Ptprd	4	36.7888	75.5907	11	27.6033	46.6312	trans	5.00327	5.10511	0.10184
519587	Ptprd	4	36.7884	75.5874	11	34.9772	57.5741	trans	5.58516	5.39761	-0.187544
10004036338	Hnf1b	11	51.295	83.7188	11	42.2608	69.6339	trans	6.03209	5.54816	-0.483926
503910	Nxn	11	46.2865	76.0715	11	44.3935	71.4097	trans	15.2695	15.4927	0.223169
10004034452	Igf2bp2	16	10.6636	22.0592	11	53.9448	90.2032	trans	5.75164	5.94797	0.196328
500766	Grk5	19	59.9904	61.1682	11	62.9752	102.488	trans	5.22577	5.2899	0.0641305
10002910302	Kcnq1	7	85.8468	150.613	11	64.2824	104.194	trans	8.44177	8.4414	-0.000376085
10002898006	Slc44a3	3	49.5523	121.163	11	68.6691	110.457	trans	5.39116	5.49136	0.1002
10004034772	Kcnq1	7	85.4553	150.311	12	8.71689	16.3289	trans	6.04828	5.52773	-0.520552
513045	Gpsm1	2	17.4858	26.2036	12	9.54236	16.9652	trans	5.0705	5.06379	-0.00671042
519646	Cox7b2	5	44.8939	71.8343	12	9.63581	17.5814	trans	108.967	112.608	3.64103
10002910511	Slc16a11	11	42.5332	70.0299	12	9.63581	17.5814	trans	5.33478	4.92048	-0.414302
10003118483	Adamts9	6	61.6567	92.7227	12	10.0093	21.4615	trans	5.28934	5.27504	-0.0143042
506195	Hhex	19	32.2743	37.515	12	10.4762	25.7798	trans	5.61209	5.15265	-0.459443
10003839955	Prox1	1	94.301	191.942	12	10.4762	25.7798	trans	8.36732	9.2034	0.836078
10002911876	Tspan8	10	70.0197	115.287	12	11.7799	28.2501	trans	6.31239	6.27443	-0.0379568
515401	Gabra4	5	44.9422	71.9626	12	13.3947	29.6854	trans	6.43718	6.06895	-0.368227
10002904779	Tmem18	12	14.0144	31.276	12	14.321	31.7821	cis	33.1088	36.1744	3.06567
514797	Psmd6	14	5.8424	14.9448	12	14.6501	32.3256	trans	5.64009	4.72383	-0.91626
10002910302	Kcnq1	7	85.8468	150.613	12	14.6501	32.3256	trans	5.25712	4.98849	-0.268638
10002924240	Dgkb	12	17.3697	39.3606	12	19.4706	46.009	cis	25.1287	25.96	0.831287
10002909795	Cdc123	2	3.11699	5.71575	12	28.0955	59.9878	trans	7.16338	6.41272	-0.750665
517662	Adamts9	6	61.6935	92.7955	12	37.2484	79.2731	trans	6.43622	6.18354	-0.252687
509563	Ssr1	13	17.0548	38.0701	13	16.7689	37.7238	cis	9.98296	10.3424	0.359481
10002919562	Ube2e2	14	9.56209	19.4062	13	18.5535	39.3247	trans	5.68939	5.69734	0.00795662
513379	Grb14	2	38.4444	64.7507	13	34.7974	65.3979	trans	7.80999	7.79142	-0.018566
515931	Pcbd2	13	30.9302	55.8781	13	35.7596	69.6881	trans	6.76489	6.23397	-0.530917
503910	Nxn	11	46.2865	76.0715	13	36.0384	70.4145	trans	6.42899	6.89425	0.465266
10004034160	Slc30a8	15	22.9188	52.1672	13	59.9522	111.433	trans	5.16227	3.44532	-1.71695
10002912336	Rreb1	13	17.0331	38.0438	13	62.5799	115.548	trans	8.17716	7.82597	-0.351181
514795	Trp53inp1	4	6.40626	11.1014	13	62.9846	116.328	trans	7.88476	7.91545	0.0306894
10002933663	Rbms1	2	35.5117	60.5883	13	62.9846	116.328	trans	5.32197	4.70534	-0.61663
517024	Mc4r	18	37.1327	67.0187	13	66.4465	119.226	trans	7.27179	7.15714	-0.114655
506195	Hhex	19	32.2743	37.515	13	68.2523	119.893	trans	5.6952	5.25272	-0.442476
516656	Rnd3	2	28.8081	50.9862	13	68.2523	119.893	trans	5.58593	4.8857	-0.700229
10002917195	Rhou	8	74.9123	126.188	13	68.2523	119.893	trans	7.21809	6.96025	-0.257839
516324	Maea	5	19.6009	33.7157	13	68.7038	120.059	trans	5.01899	4.81564	-0.203349
10004036338	Hnf1b	11	51.295	83.7188	13	68.7038	120.059	trans	5.72664	5.65258	-0.0740619
513379	Grb14	2	38.4444	64.7507	14	30.2674	56.8818	trans	7.35265	7.25146	-0.101192
10004035814	Il20ra	10	12.3296	19.4797	15	16.8814	38.9558	trans	5.39577	5.282	-0.113766
10002924240	Dgkb	12	17.3697	39.3606	15	18.3738	43.2135	trans	7.12782	6.92536	-0.202458
10004035546	Adam30	3	40.6806	97.9669	15	22.0139	50.0428	trans	5.53781	5.70726	0.169444
10002907712	Tmem45b	9	17.7971	31.234	15	23.3467	53.1719	trans	5.46945	5.47989	0.0104349
10002906711	Vegfa	17	23.1233	46.1555	15	24.2353	55.258	trans	5.36192	5.67722	0.315297
10002916454	Dner	1	43.7127	84.3665	15	55.6936	97.5424	trans	11.6007	11.4231	-0.17764
515401	Gabra4	5	44.9422	71.9626	15	56.7437	98.7408	trans	7.64416	8.09495	0.45079
10002948552	Klf14	6	31.8268	30.9067	16	21.3812	37.5723	trans	5.99999	6.7324	0.732409
503165	Wwox	8	64.2293	117.877	17	5.44526	9.16339	trans	6.142	6.13804	-0.0039606
10002931396	Irs1	1	42.5834	82.2299	17	6.12992	9.71125	trans	5.38049	5.8095	0.429011
10004034772	Kcnq1	7	85.4553	150.311	17	10.8126	22.1428	trans	5.52413	6.01927	0.495137
10002917195	Rhou	8	74.9123	126.188	17	11.7305	24.6483	trans	9.1421	9.86259	0.720485
10004034160	Slc30a8	15	22.9188	52.1672	17	11.7305	24.6483	trans	9.46691	10.8692	1.40231
10002916454	Dner	1	43.7127	84.3665	17	13.41	27.2453	trans	9.13004	9.13947	0.0094263
10002911832	Crhr2	6	48.9903	55.0401	17	14.2105	28.3592	trans	6.2943	6.58661	0.292302
10002913490	Fitm2	2	83.4456	163.292	17	14.6108	28.9162	trans	5.02126	5.31554	0.294282
10002915377	Jazf1	6	47.6257	52.7193	17	14.6108	28.9162	trans	7.26211	7.67694	0.414838
10004038248	Zfand3	17	15.4311	30.3468	17	15.9548	31.3023	cis	12.6632	12.6857	0.0224863
10002901729	Kif11	19	32.2578	37.4962	17	16.427	32.1681	trans	7.72762	7.75445	0.026834
10002912054	Lyplal1	1	88.5731	187.912	17	16.427	32.1681	trans	5.3305	5.64481	0.314309
10004037342	St6gal1	16	11.7659	23.3586	17	18.9706	38.3191	trans	5.10648	5.20772	0.101238
499759	Ache	5	81.4683	137.735	17	21.3051	43.2261	trans	5.38457	5.49186	0.107288
10004035814	Il20ra	10	12.3296	19.4797	17	21.3051	43.2261	trans	5.59728	5.77318	0.175896
10002907712	Tmem45b	9	17.7971	31.234	17	21.6474	43.5591	trans	6.35324	6.39664	0.0433952
10004037064	Adcy5	16	20.1668	35.3057	17	21.6474	43.5591	trans	7.08153	8.29194	1.21041
10003114440	Kcnj11	7	33.5152	53.3525	17	24.6617	49.4043	trans	5.51404	5.33542	-0.178616
506195	Hhex	19	32.2743	37.515	17	29.4404	55.5764	trans	6.3241	6.28804	-0.0360539
517551	Lpin2	17	39.8957	71.5958	17	31.97	60.4594	trans	13.1187	13.1979	0.0792027
10002912054	Lyplal1	1	88.5731	187.912	18	17.4691	33.5324	trans	5.25555	6.45069	1.19515
10002916454	Dner	1	43.7127	84.3665	18	54.0219	82.6289	trans	5.65341	5.94475	0.291342
510335	Pten	19	27.0851	32.8945	18	55.3282	87.8007	trans	5.39054	5.55761	0.167075
518695	Tle4	19	9.61563	14.5227	19	17.6502	22.8734	trans	5.77258	5.83605	0.0634702
10002940291	Glis3	19	24.7609	28.3334	19	17.6502	22.8734	trans	11.9604	17.597	5.63657
10004036817	Ide	19	32.124	37.3435	19	26.1161	30.0557	trans	9.29673	9.51543	0.218704
515401	Gabra4	5	44.9422	71.9626	19	48.5435	54.4079	trans	6.8675	6.04576	-0.821744
513379	Grb14	2	38.4444	64.7507	19	49.3211	54.9162	trans	7.77165	7.49171	-0.279937
10002911876	Tspan8	10	70.0197	115.287	19	49.4144	55.1039	trans	8.35797	6.29689	-2.06107
10004037520	Tcf7l2	19	52.3275	56.0076	19	51.9423	55.9002	cis	7.6379	6.50638	-1.13152
